# Supplementary material
Source: PubMed Central journal article supplement (PMC4249422)
Supplement: AAC.03539-14_zac011143427so1.pdf [file AAC.03539-14_zac011143427so1.pdf]

TABLE S1 Sample preparation procedure and experimental conditions

| Agent (Abbreviation)                | Supplier                                     | Inhibitor             | Concn. of inhibitor<br>( $\mu\text{g/ml}$ ) | Stock solution |         | Range of concn.<br>( $\mu\text{g/ml}$ ) |
|-------------------------------------|----------------------------------------------|-----------------------|---------------------------------------------|----------------|---------|-----------------------------------------|
|                                     |                                              |                       |                                             | mg/ml          | Solvent |                                         |
| Meropenem (MEM)                     | Meiji Seika Pharma Co., Ltd. (Tokyo, Japan)  | -                     | 0                                           | 2.56           | 7H9     | 64 – 0.0625                             |
|                                     |                                              | Potassium clavulanate | 2 or 4                                      | 16.0           | 7H9     |                                         |
|                                     |                                              | Avibactam             | 2 or 4                                      | 16.0           | 7H9     |                                         |
| Biapenem (BPM)                      | Meiji Seika Pharma Co., Ltd. (Tokyo, Japan)  | -                     | 0                                           | 2.56           | 7H9     | 64 – 0.0625                             |
|                                     |                                              | Potassium clavulanate | 2 or 4                                      |                |         |                                         |
|                                     |                                              | Avibactam             | 2 or 4                                      |                |         |                                         |
| Tebipenem (TBM)                     | Meiji Seika Pharma Co., Ltd. (Tokyo, Japan)  | -                     | 0                                           | 2.56           | 7H9     | 64 – 0.0625                             |
|                                     |                                              | Potassium clavulanate | 2 or 4                                      |                |         |                                         |
|                                     |                                              | Avibactam             | 2 or 4                                      |                |         |                                         |
| Ampicillin (AMP)                    | Meiji Seika Pharma Co., Ltd. (Tokyo, Japan)  | -                     | 0                                           | 25.6           | DMSO    | 128 – 0.125                             |
|                                     |                                              | Potassium clavulanate | 2 or 4                                      |                |         |                                         |
|                                     |                                              | Avibactam             | 2 or 4                                      |                |         |                                         |
| Amoxicillin (AMX)                   | Meiji Seika Pharma Co., Ltd. (Tokyo, Japan)  | -                     | 0                                           | 25.6           | DMSO    | 128 – 0.125                             |
|                                     |                                              | Potassium clavulanate | 2 or 4                                      |                |         |                                         |
|                                     |                                              | Avibactam             | 2 or 4                                      |                |         |                                         |
| Clavulanate (CLA)                   | Meiji Seika Pharma Co., Ltd. (Tokyo, Japan)  |                       |                                             | 10.24          | 7H9     | 512 – 0.5                               |
| Avibactam (AVI)                     | Meiji Seika Pharma Co., Ltd. (Tokyo, Japan)  |                       |                                             | 10.24          | 7H9     | 512 – 0.5                               |
| Amikacin (AMK)                      | Sigma-Aldrich (MO, USA)                      |                       |                                             | 10.24          | 7H9     | 512 – 0.5                               |
| Isoniazid (INH)                     | Sigma-Aldrich (MO, USA)                      |                       |                                             | 0.64           | 7H9     | 32 – 0.031                              |
| Rifampicin (RIF)                    | Sigma-Aldrich (MO, USA)                      |                       |                                             | 25.6           | DMSO    | 128 – 0.125                             |
| Streptomycin (STR)                  | Sigma-Aldrich (MO, USA)                      |                       |                                             | 5.12           | 7H9     | 256 – 0.25                              |
| Ethambutol (EMB)                    | Sigma-Aldrich (MO, USA)                      |                       |                                             | 5.12           | 7H9     | 256 – 0.25                              |
| Moxifloxacin (MXF)                  | Kemprotec Limited (Middlesbrough, UK)        |                       |                                             | 1.28           | 7H9     | 64 – 0.0625                             |
| Levofloxacin (LVX)                  | Daiichi Sankyo Corporation (Tokyo, Japan)    |                       |                                             | 1.28           | 7H9     | 64 – 0.0625                             |
| Ethionamide (ETH)                   | Sigma-Aldrich (MO, USA)                      |                       |                                             | 12.8           | DMSO    | 64 – 0.0625                             |
| <i>p</i> -Aminosalicylic acid (PAS) | Sigma-Aldrich (MO, USA)                      |                       |                                             | 6.40           | DMSO    | 32 – 0.031                              |
| Cycloserine (CS)                    | Sigma-Aldrich (MO, USA)                      |                       |                                             | 1.28           | 7H9     | 64 – 0.0625                             |
| Clarithromycin (CLR)                | Wako Pure Chemical Industries (Osaka, Japan) |                       |                                             | 12.8           | DMSO    | 64 – 0.0625                             |

**TABLE S2 Drug-resistance profiles of clinical isolates**

| Strain No. |            | Resistance to | <i>pncA</i> mutation |                   |                                   |            |
|------------|------------|---------------|----------------------|-------------------|-----------------------------------|------------|
|            |            |               | Nucleotide change    | Amino acid change |                                   |            |
| 1          | XDR-TB     | INH RIF       | LVX MXF AMK          | A152C             | His51Pro                          |            |
| 2          | Pre-XDR-TB | INH RIF STR   | LVX MXF              |                   |                                   |            |
| 3          | Pre-XDR-TB | INH RIF       | EMB LVX MXF          |                   |                                   |            |
| 4          | Pre-XDR-TB | INH RIF       | EMB LVX MXF          | C24G              | Asp8Glu                           |            |
| 5          | Pre-XDR-TB | INH RIF       | EMB LVX MXF          |                   |                                   |            |
| 6          | Pre-XDR-TB | INH RIF STR   | EMB LVX MXF          | G415A             | Val139Met                         |            |
| 7          | XDR-TB     | INH RIF STR   | EMB LVX              | AMK               | Not amplified                     |            |
| 8          | XDR-TB     | INH RIF STR   | EMB LVX MXF          | AMK               | Insertion sequence (24 bp) at 243 | Frameshift |
| 9          | MDR-TB     | INH RIF STR   |                      |                   |                                   |            |
| 10         | MDR-TB     | INH RIF STR   |                      | A139G             | Thr47Ala                          |            |
| 11         | Pre-XDR-TB | INH RIF       | LVX MXF              |                   |                                   |            |
| 12         | Pre-XDR-TB | INH RIF       | LVX MXF              |                   |                                   |            |
| 13         | Pre-XDR-TB | INH RIF STR   | EMB LVX              | C234A             | Gly78Gly                          |            |
| 14         | MDR-TB     | INH RIF       | EMB                  | T20C              | Val7Ala                           |            |
| 15         | MDR-TB     | INH RIF STR   |                      | T254G             | Leu85Arg                          |            |
| 16         | Pre-XDR-TB | INH RIF       | EMB LVX MXF          | G7A               | Ala3Thr                           |            |
| 17         | Pre-XDR-TB | INH RIF STR   | EMB LVX MXF          |                   |                                   |            |
| 18         | Pre-XDR-TB | INH RIF STR   | EMB LVX MXF          | T307C             | Tyr103His                         |            |
| 19         | MDR-TB     | INH RIF       | EMB                  | C234A             | Gly78Gly                          |            |
| 20         | Pre-XDR-TB | INH RIF       | EMB LVX              |                   |                                   |            |
| 21         | Pre-XDR-TB | INH RIF       | LVX MXF              | T26G              | Val9Gly                           |            |

MDR-TB, multi-drug resistant TB; Pre-XDR-TB, pre-extensively drug-resistant TB; XDR-TB, extensively drug-resistant TB; INH, isoniazid; RIF, rifampicin; STR, streptomycin; EMB, ethambutol; LVX, levofloxacin; MXF, moxifloxacin; AMK, amikacin.
